# Supplementary material for: RNA ligation of very small pseudo nick structures by T4 RNA ligase 2, leading to efficient production of versatile RNA rings
Source: Royal Society of Chemistry journal article supplement (doi:10.1039/c9ra01513b), 2019-01-01
Supplement: c9ra01513b1.pdf [file c9ra01513b1.pdf]

## **RNA ligation of very small pseudo nick structures by T4 RNA ligase 2, leading to efficient production of versatile RNA rings**

Kai Cheng<sup>1,†</sup>, Ran An<sup>1,2,†</sup>, Yixiao Cui<sup>1</sup>, Yaping Zhang<sup>1</sup>, Xutiange Han<sup>1</sup>, Zhe Sui<sup>1</sup>, Hui Chen, Xingguo Liang<sup>1,2,\*</sup>  
and Makoto Komiyama<sup>1,\*</sup>

1 College of Food Science and Engineering, Ocean University of China, Qingdao 266003, China

2 Laboratory for Marine Drugs and Bioproducts, Qingdao National Laboratory for Marine Science and  
Technology, Qingdao 266235, China

\*To whom correspondence should be addressed. Tel: +86 532 82031086; Fax: +86 532 82031086; Email:  
liangxg@ouc.edu.cn

Correspondence may also be addressed to Makoto Komiyama. Tel: +86 532 82031318; Fax: +86 532 82031086;  
Email: makotokomiyama@yahoo.com

†These authors contributed equally to this work as first authors.

**Table S1 The RNA sequences used in this study.**

| Name         | Sequence (5' → 3')              | Length (nt) |
|--------------|---------------------------------|-------------|
| <b>L-22a</b> | ACUGCCCCAGUUAGCCCCGCUA          | 22          |
| <b>L-22b</b> | CCCGCCCAAUUAAGCCCCGCUA          | 22          |
| <b>L-22c</b> | ACUGCCCCAGUAAAACCCGCCC          | 22          |
| <b>L-22d</b> | CCCGCCCAAUUAACCCGACC            | 22          |
| <b>L-8</b>   | CCUAAUCA                        | 8           |
| <b>L-21</b>  | CCUAAUCACGGUCAAGGACCG           | 21          |
| <b>L-24</b>  | ACUGCCCCAGUUUUAGCCCCGCUA        | 24          |
| <b>L-23a</b> | ACUGCCCCAGUUAGCCCCGCUAU         | 23          |
| <b>L-18</b>  | GGCCCCCGAGCCCCGCUC              | 18          |
| <b>L-15</b>  | GACCUCGGCCCCGCC                 | 15          |
| <b>L-12</b>  | GAGUCCGCCCCG                    | 12          |
| <b>L-23b</b> | CUGAGUUGUGUUCUGCUGUUGUU         | 23          |
| <b>L-23c</b> | UGCUGUUGUUCUGAGUUGUGUUC         | 23          |
| <b>L-31a</b> | CCCUUAUAAUUUCCUCCUCCAUAUUUCCUU  | 31          |
| <b>L-31b</b> | UCCUUCCCUUAUAAUUUCCUCCUCCAUAUUU | 31          |

**Table S2 The DNA sequences used in this study.**

| Name            | Sequence (5'→3')       | Length (nt) |
|-----------------|------------------------|-------------|
| <b>DNA21</b>    | CGGTCAAGGACCGTGATTAGG  | 21          |
| <b>DNA19</b>    | CGGTCAAGGACCGTGATTA    | 19          |
| <b>DNA17</b>    | CGGTCAAGGACCGTGAT      | 17          |
| <b>DNA15</b>    | CGGTCAAGGACCGTG        | 15          |
| <b>DNA13</b>    | CGGTCAAGGACCG          | 13          |
| <b>DNA10a-8</b> | TGATTAGGAA             | 10          |
| <b>DNA10a-6</b> | TGATTAATAAA            | 10          |
| <b>DNA10a-4</b> | TGATATAATAAA           | 10          |
| <b>DNA10a-2</b> | TGCAATAATAAA           | 10          |
| <b>DNA10a-0</b> | ACCAATAATAAA           | 10          |
| <b>DNA8a</b>    | GCTAATTT               | 8           |
| <b>DNA10b</b>   | GGCTAATTTG             | 10          |
| <b>DNA12</b>    | GGGCTAATTTGG           | 12          |
| <b>DNA22</b>    | GGTCGGGTTTAATTTGGGCGGG | 22          |
| <b>DNA8b</b>    | TGATTAGG               | 8           |
| <b>DNA6</b>     | TGATTA                 | 6           |
| <b>DNA5</b>     | TGATT                  | 5           |

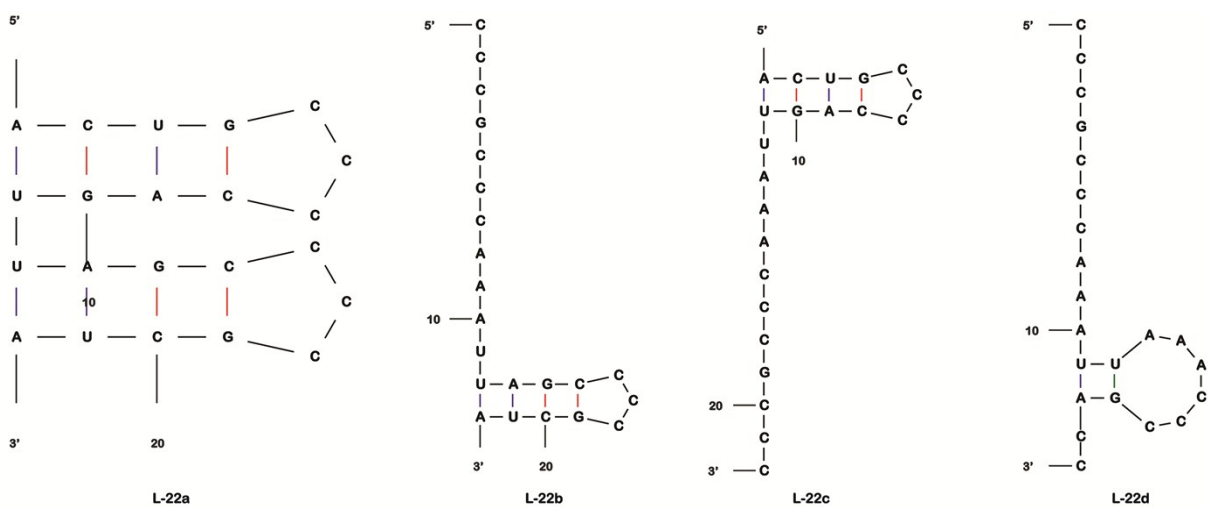

**Fig. S1 The secondary structures of RNAs were simulated by Mfold software ( $[Mg^{2+}] = 2\text{ mM}$ ,  $25^{\circ}\text{C}$ ).**

The mfold structures of L-22a, L-22b, L-22c and L-22d are shown.

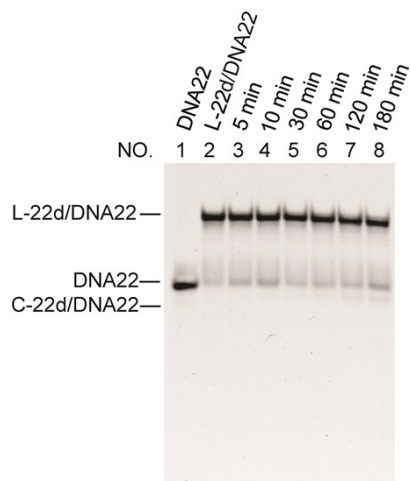

**Fig. S2 Non-denaturing PAGE (15%) for intramolecular ligation of L-22d without any secondary structure.**

Since the single-stranded L-22d RNA cannot be clearly stained by SYBR Gold, its complementary DNA sequence was added to assist the dyeing. Accordingly, the bands shown here are duplexes. Lane 1, only DNA22; lane 2, L-22d + DNA22; lane 3-8: L-22d treated with Rnl2 for 5 min, 10 min, 30 min, 60 min, 120 min and 180 min, respectively (then, DNA22 as the complementary DNA of L-22d was added). [RNA] = 1  $\mu$ M, [DNA] = 1  $\mu$ M and [Rnl2] = 0.4 U/ $\mu$ L in 1 $\times$ buffer at 25°C.

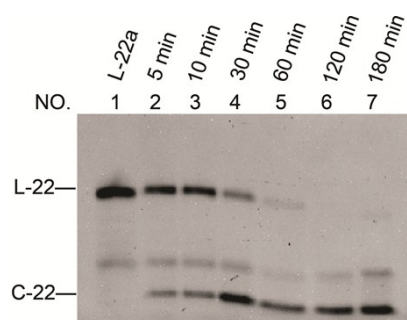

**Fig. S3 Denaturing PAGE (12%) analysis for intramolecular cyclization of L-22a by Rnl2.**

Lane 1, only L-22a; lane 2-7: L-22a treated with Rnl2 for 5 min, 10 min, 30 min, 60 min, 120 min and 180 min, respectively. [RNA] = 1  $\mu$ M and [Rnl2] = 0.04 U/ $\mu$ L in 1 $\times$ buffer at 25°C.

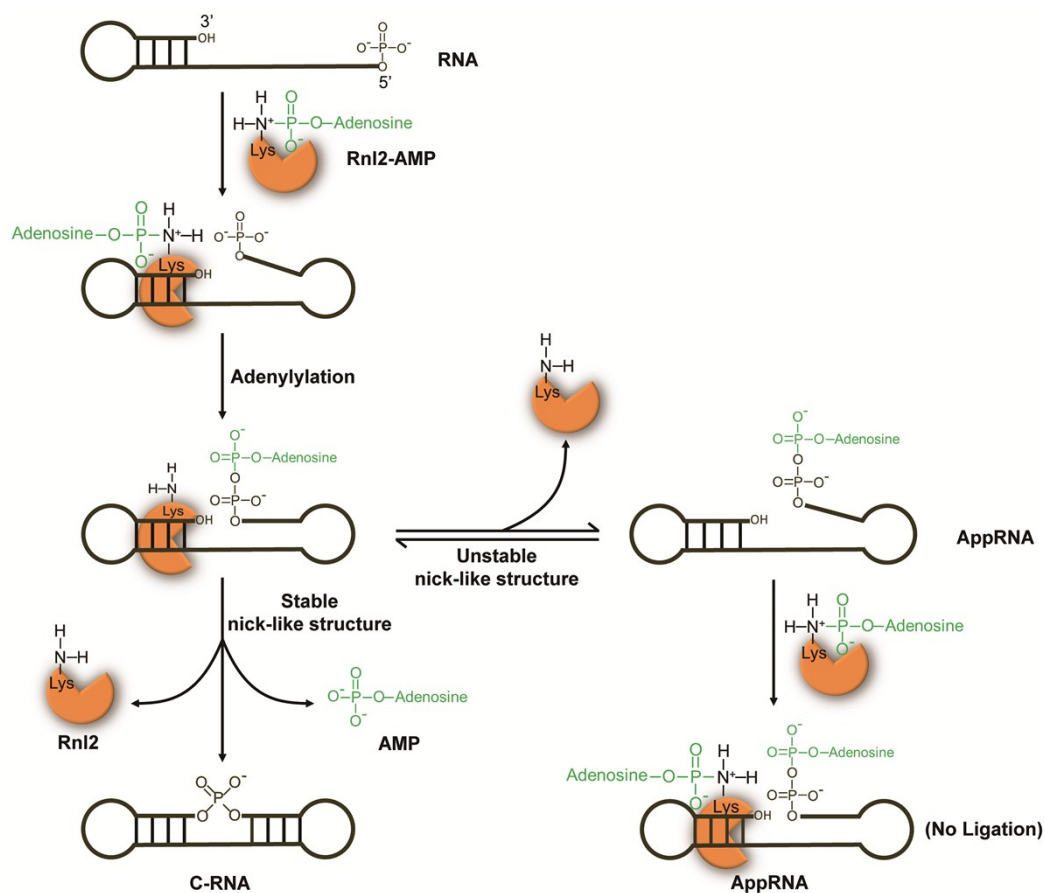

**Fig. S4 Schematic diagram of RNA ligation by forming pseudo nick structures.**

At first, the adenylated Rnl2 binds to the duplex structure at 3'-end, and then the 5'-phosphate is adenylated. If the 5'-end can form a duplex structure which is stable enough, the ligation happens efficiently. Otherwise, the ligation hardly happens.

The RNA involving double-stranded structure (or pseudo duplex) at 3'-end is required to be bound by adenylated Rnl2 (Rnl2-AMP). Only in this case, the 5'-phosphate can be adenylated. In other words, duplex structure at 3'-end is essential for 5'-adenylation. If the stable nick-like structure exists, the ligation occurs efficiently. If non-stable nick-like structure forms, the ligation hardly happens, and only the RNA-adenylate intermediate (AppRNA) forms in the case that nick-like structure is unstable enough.

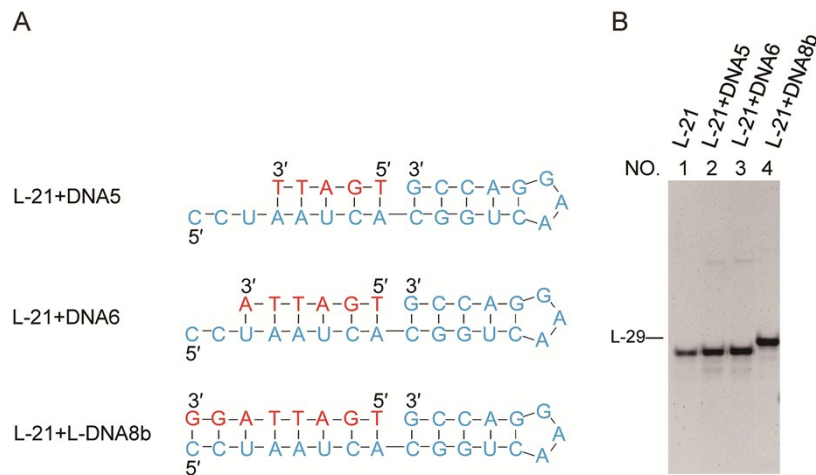

**Fig. S5 Dependence of the ligation efficiency on the length of duplex part (DNA/RNA heteroduplex) in the 5'-phosphate side of joining site (as well as in Fig. 3).**

(A) The sequences of RNA (blue) and DNA (red). (B) Denaturing PAGE (12%) analysis for the ligation at 25°C for 12 h. Lane 1, L-21 only. Lane 2, ligation of L-21 with DNA5. Lane 3, ligation of L-21 with DNA6. Lane 4, ligation of L-21 and DNA8b. [RNA] = 1  $\mu$ M, [DNA] = 2  $\mu$ M and [Rnl2] = 0.4 U/ $\mu$ L in 1 $\times$ buffer.

Here, all the ligations are believed to occurred, although we don't know the exact yields. The intermolecular ligation products of ssRNA (L-21) and ssDNA (DNA5 or DNA6) showed similar mobility with the substrate of L-21 on the PAGE gel (compare lane 2 and lane 3 with lane 1), because these products involve very stable hairpin structures.



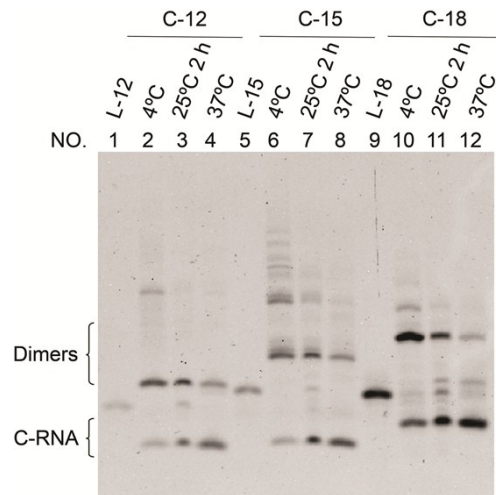

**Fig. S6 Effects of temperature on cyclization of L-12, L-15 and L-18.**

Lanes 1, 5 and 9, L-12, L-15 and L-18 only. Lanes 2, 6 and 10, L-12, L-15 and L-18 treated with Rnl2 at 4°C for 12 h. Lanes 3, 7 and 11, L-12, L-15 and L-18 treated with Rnl2 at 25°C for 2 h. Lanes 4, 8 and 12, L-12, L-15 and L-18 treated with Rnl2 at 37°C for 12 h. [RNA] = 1  $\mu$ M and [Rnl2] = 0.4 U/ $\mu$ L in 1 $\times$  buffer. 12% denaturing PAGE was used.

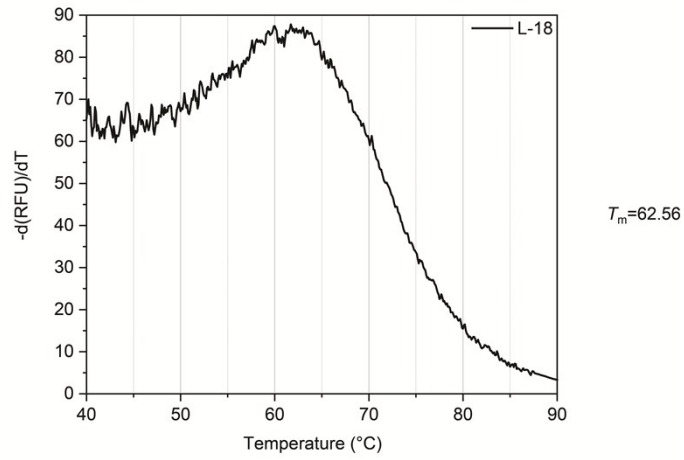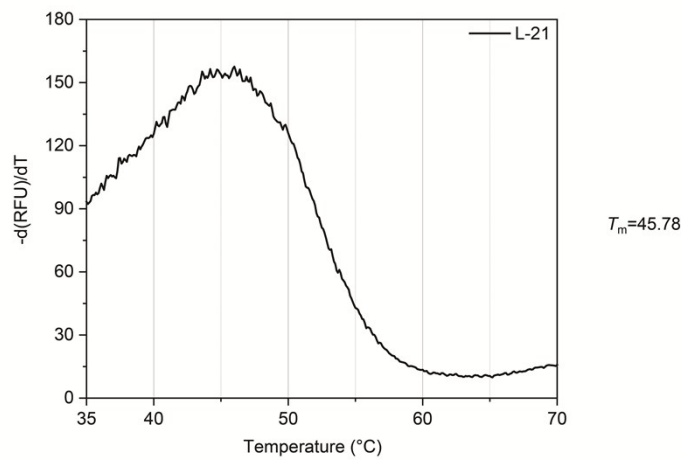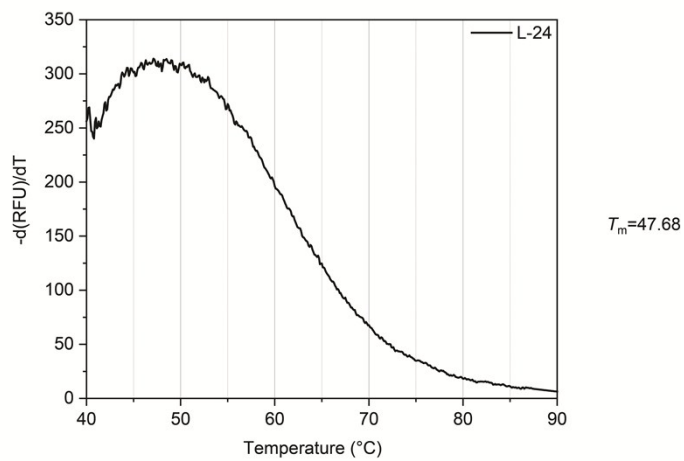

**Fig. S7 High resolution melting curve analysis of L-18, L-21 and L-24.**

$-d(\text{RFU})/dT$ : the rate of change of the relative fluorescence units (RFU) with time (T). The RNAs were measured at  $1 \mu\text{M}$  in  $10 \mu\text{L}$  solution containing  $1 \times \text{EvaGreen}$  and  $1 \times \text{Rnl2}$  buffer.

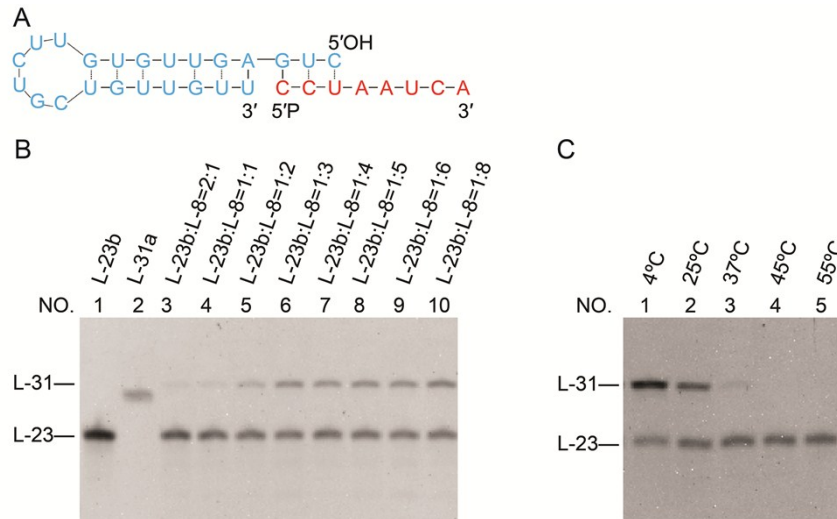

**Fig. S8 Concentration effects on the ligation of L-23b and L-8 involving highly unstable stems.**

(A) Schematic diagram of connection between L-23b and L-8. Only L-8 was 5'-terminal phosphorylated. (B) Denaturing PAGE (12%) for the ligation product.  $[L-8] = 0.25, 0.5, 1.0, 1.5, 2.0, 2.5, 3.0$  and  $4.0 \mu\text{M}$  in lanes 3-10, respectively ( $[L-23b] = 0.5 \mu\text{M}$  at  $25^\circ\text{C}$  for 6 h). L-8 cannot be observed on the gel. (C) Temperature dependence of the ligation of L-23b and L-8.  $[L-23b] = 0.5 \mu\text{M}$ ,  $[L-8] = 4.0 \mu\text{M}$ .

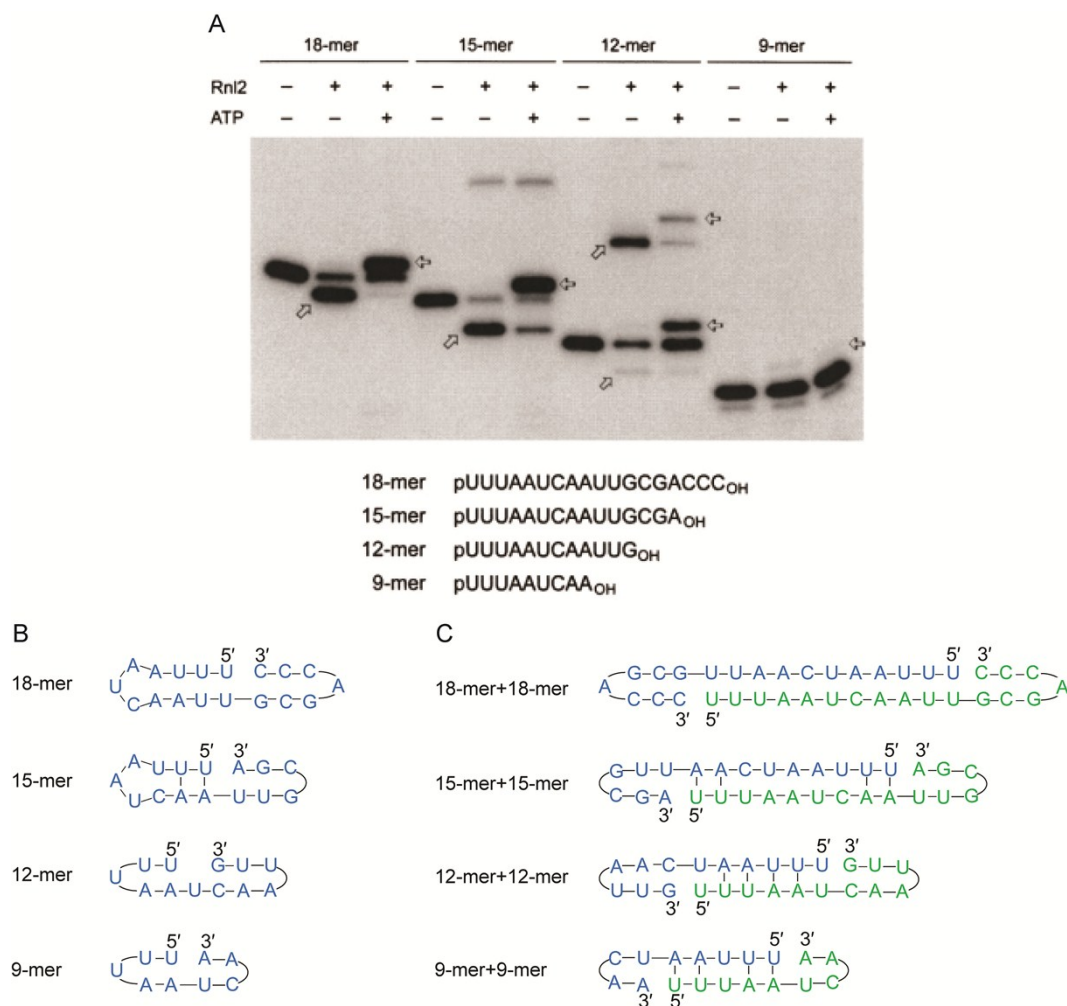

**Fig. S9 Analysis of the results in the literature in terms of the “nick-like structure mechanism”.**

(A) PAGE analysis of cyclization of 9-mer, 12-mer, 15-mer and 18-mer (from Yin S, Ho C K, Miller E S, Shuan S., Characterization of bacteriophage KVP40 and T4 RNA ligase 2. *Virology*, 2004, 319(1):141). In (B) and (C), the nick-like structures we propose for intramolecular and intermolecular cyclization are presented, respectively.

This reference showed that 1) 18-mer RNA only forms monomeric circle; 2) 15-mer RNA could be circularized to form monomeric circle, but dimeric product was observed; 3) Ligation of 12-mer RNA almost gave only dimeric product; 4) Neither monomeric nor dimeric products were obtained for the 9-mer RNA substrate. These results are satisfactorily interpreted in terms of “nick-like structure mechanism”.

As shown in (B), 12-mer was not ligated to a circle because no nick-like structure could be formed. Both 15-mer and 18-mer formed nick-like structure so that they could be circularized to monomeric ring. 15-mer showed higher yield than 18-mer, because of the formation of more stable nick-like structure. The stability of intermolecular secondary structures in (C) was in the following order: 12-mer > 15-mer > 18-mer, which was in accordance with their efficiency for the formation of dimers. For 9-mer, no ligation occurred because it could not form any effective secondary structure. Alternatively, the nick-like structure of 9-mer could be too short for Rnl2 to bind for ligation.
